# Supplementary material
Source: PubMed Central journal article supplement (PMC3004299)
Supplement: supp_84_24_12564__1.pdf [file supp_84_24_12564__1.pdf]

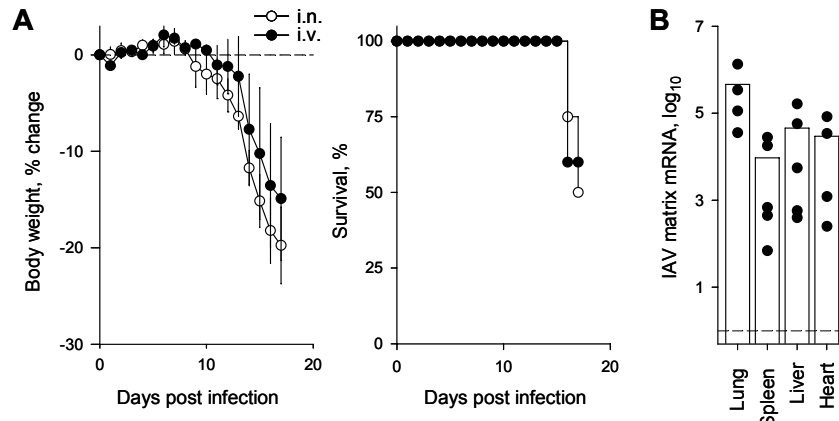

FIG S1. Comparison of intranasal and intravenous routes of IAV infection of lymphocyte-deficient mice. (A) Weight change (*left*) and survival (*right*) of *Rag1*<sup>-/-</sup> mice following intranasal (i.n.) or intravenous (i.v.) infection with PR8. Data are from 5-6 mice per group. (B) Levels of PR8 *matrix* mRNA in the indicated organs from intravenously-infected *Rag1*<sup>-/-</sup> mice, measured 15 days following PR8 infection. Each symbol represents an individual mouse and bars denote the mean level in each organ.

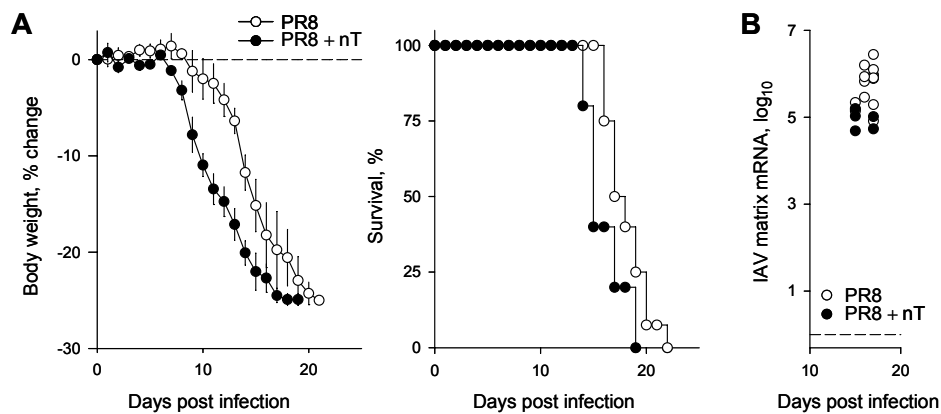

FIG S2. Effect of naïve T cell transfer on the course of IAV infection of lymphocyte-deficient mice. (A) Weight change (*left*) and survival (*right*) of PR8-infected *Rag1*<sup>-/-</sup> mice in the presence (PR8 + nT) or absence (PR8) of adoptively transferred Treg cell-depleted naïve CD25<sup>-</sup>CD44<sup>low</sup> CD4<sup>+</sup> T cells. Data are from 5-8 mice per group. Median survival times were PR8 = 17.9 days and PR8 + nT = 15.8 days,  $p= 0.021$ . (B) Levels of PR8 *matrix* mRNA in the lungs of PR8-infected *Rag1*<sup>-/-</sup> mice, with (PR8 + nT) or without (PR8) adoptively transferred naïve CD4<sup>+</sup> T cells. Each symbol represents an individual mouse.  $p= 0.050$ .

TABLE S1. IAV-induced transcriptional changes in the lungs of lymphocyte-deficient mice. Genes with >4-fold induced transcription in the lungs of PR8-infected *Rag1*<sup>-/-</sup> mice, in comparison with uninfected *Rag1*<sup>-/-</sup> control mice.

| Gene symbol                | Fold change | Sequence reference     |
|----------------------------|-------------|------------------------|
| <i>Saa3</i>                | 34.437      | NM_011315              |
| <i>Arg1</i>                | 29.103      | NM_007482              |
| <i>Sprr2a</i>              | 26.011      | NM_011468              |
| <i>Slfn4</i>               | 22.557      | NM_011410              |
| <i>Ms4a4a</i>              | 20.202      | XM_986941              |
| <i>Ccl8</i>                | 19.965      | NM_021443              |
| <i>Chi3l4</i>              | 18.697      | NM_145126              |
| <i>Cxcl10</i>              | 16.216      | NM_021274              |
| <i>C3ar1</i>               | 15.445      | NM_009779              |
| <i>Ccl24</i>               | 14.686      | NM_019577              |
| <i>Mmp12</i>               | 13.324      | NM_008605              |
| <i>Gatm</i>                | 13.258      | NM_025961              |
| <i>Irf7</i>                | 12.577      | NM_016850              |
| <i>Irg1</i>                | 12.238      | NM_008392              |
| <i>Ms4a4c</i>              | 12.145      | NM_029499              |
| <i>Cxcl13</i>              | 11.681      | NM_018866              |
| <i>Ear11</i>               | 10.314      | NM_053113              |
| <i>Ifi44</i>               | 10.134      | NM_133871              |
| <i>Pdcd1lg2</i>            | 9.590       | NM_021396              |
| <i>Tdo2</i>                | 9.589       | NM_019911              |
| <i>Pyhin1</i>              | 9.368       | NM_175026              |
| <i>Timp1</i>               | 9.281       | NM_001044384 NM_011593 |
| <i>Ms4a6d</i>              | 8.841       | NM_026835              |
| <i>Pla2g7</i>              | 8.600       | NM_013737              |
| <i>Ifi204 Mnda Ifi205</i>  | 8.557       | NM_008329 NM_001033450 |
| <i>Ddx60</i>               | 8.479       | NM_001081215           |
| <i>Zbp1</i>                | 8.274       | NM_021394              |
| <i>Ifit1</i>               | 8.232       | NM_008331              |
| <i>Oas1g Oas1a</i>         | 8.157       | NM_011852 NM_145211    |
| <i>Cxcl9</i>               | 8.030       | NM_008599              |
| <i>Rsad2</i>               | 7.816       | NM_021384              |
| <i>Ms4a6b</i>              | 7.801       | NM_027209              |
| <i>Slfn1</i>               | 7.757       | NM_011407              |
| <i>Fcgr1</i>               | 7.413       | NM_010186              |
| <i>Spp1</i>                | 7.300       | NM_009263              |
| <i>Oas3 Oit3</i>           | 7.291       | NM_145226              |
| <i>Ccr5</i>                | 7.289       | NM_009917              |
| <i>Alox15</i>              | 7.102       | NM_009660              |
| <i>Ifi205</i>              | 7.000       | NM_172648              |
| <i>9930022N03Rik</i>       | 6.927       | NM_177363              |
| <i>Mmp13</i>               | 6.911       | NM_008607              |
| <i>Ly6i</i>                | 6.904       | NM_020498              |
| <i>Ifit2</i>               | 6.826       | NM_008332              |
| <i>Msr1</i>                | 6.818       | NM_031195 NM_001113326 |
| <i>EG240327</i>            | 6.803       | NM_001033767           |
| <i>Gpnmb</i>               | 6.730       | NM_053110              |
| <i>Slc7a11</i>             | 6.284       | NM_011990              |
| <i>Gp49a Lilrb4</i>        | 6.237       | NM_008147              |
| <i>Gpr65</i>               | 6.175       | NM_008152              |
| <i>Oasl1</i>               | 6.127       | NM_145209              |
| <i>Plac8</i>               | 6.123       | NM_139198              |
| <i>Mx1</i>                 | 6.060       | NM_010846 NR_003520    |
| <i>Ccl9</i>                | 6.056       | NM_011338              |
| <i>Oas2</i>                | 5.933       | NM_145227              |
| <i>Serpina3g Serpina3f</i> | 5.850       | NM_009251 NM_001033335 |
| <i>Rnu3a</i>               | 5.809       | NR_002842              |
| <i>C1qb</i>                | 5.724       | NM_009777              |
| <i>Ms4a6c</i>              | 5.721       | NM_028595              |
| <i>EG240921</i>            | 5.673       | XM_136331 XR_034468    |
| <i>Isg15</i>               | 5.648       | NM_015783              |

| Gene symbol          | Fold change | Sequence reference     |
|----------------------|-------------|------------------------|
| <i>Oasl2</i>         | 5.577       | NM_011854              |
| <i>Ms4a7</i>         | 5.548       | NM_027836 NM_001025610 |
| <i>ligp1</i>         | 5.438       | NM_021792              |
| <i>Slc26a4</i>       | 5.366       | NM_011867              |
| <i>Ccl7</i>          | 5.300       | NM_013654              |
| <i>Slc7a8</i>        | 5.297       | NM_016972              |
| <i>Trim30</i>        | 5.276       | NM_009099              |
| <i>Apobec1</i>       | 5.203       | NM_031159              |
| <i>Fcgr2b</i>        | 5.120       | NM_001077189 NM_010187 |
| <i>Gvin1</i>         | 5.116       | NM_029000              |
| <i>Tlr13</i>         | 5.094       | NM_205820              |
| <i>Clec5a</i>        | 5.080       | NM_001038604 NM_021364 |
| <i>Sfn8</i>          | 5.069       | NM_181545              |
| <i>EG432555</i>      | 5.062       | NM_001024230           |
| <i>Usp18</i>         | 5.038       | NM_011909              |
| <i>Dhx58</i>         | 4.977       | NM_030150              |
| <i>Fcgr4</i>         | 4.964       | NM_144559              |
| <i>EG625046</i>      | 4.894       | XM_889589              |
| <i>Itgam</i>         | 4.892       | NM_001082960 NM_008401 |
| <i>Ifit3</i>         | 4.857       | NM_010501              |
| <i>Cyp4f18</i>       | 4.851       | NM_024444              |
| <i>Irgm</i>          | 4.813       | NM_008326              |
| <i>Tgtp</i>          | 4.780       | NM_011579              |
| <i>Il1rn</i>         | 4.767       | NM_031167 NM_001039701 |
| <i>Tnip3</i>         | 4.752       | NM_001001495           |
| <i>Oas1a</i>         | 4.709       | NM_145211              |
| <i>Ifi203</i>        | 4.688       | NM_001045481 NM_008328 |
| <i>AI451617</i>      | 4.650       | NM_199146              |
| <i>C1qc</i>          | 4.623       | NM_007574              |
| <i>Cd84</i>          | 4.605       | NM_013489              |
| <i>Ccr1</i>          | 4.600       | NM_009912              |
| <i>LOC667370</i>     | 4.567       | NM_001005858           |
| <i>Prg4</i>          | 4.563       | NM_021400 NM_001110146 |
| <i>Il7r</i>          | 4.559       | NM_008372              |
| <i>Sfn9</i>          | 4.513       | NM_172796              |
| <i>Apol9b Apol9a</i> | 4.503       | NM_173743              |
| <i>EG449630</i>      | 4.501       | NR_002172              |
| <i>Lilrb4</i>        | 4.432       | NM_013532              |
| <i>Tgtp</i>          | 4.422       | NM_011579              |
| <i>Clec4a1</i>       | 4.391       | NM_199311              |
| <i>Gbp5</i>          | 4.385       | NM_153564              |
| <i>Ccl2</i>          | 4.362       | NM_011333              |
| <i>Serpnb2</i>       | 4.322       | NM_011111              |
| <i>Cxcl2</i>         | 4.247       | NM_009140              |
| <i>Mafb</i>          | 4.244       | NM_010658              |
| <i>Ch25h</i>         | 4.156       | NM_009890              |
| <i>Gsdmc2</i>        | 4.134       | NM_177912              |
| <i>Pglyrp1</i>       | 4.117       | NM_009402              |
| <i>Cd180</i>         | 4.094       | NM_008533              |
| <i>Csprs</i>         | 4.083       | NM_033616              |
| <i>Cd300lf</i>       | 4.075       | NM_145634              |
| <i>C1qa</i>          | 4.074       | NM_007572              |
| <i>EG668139</i>      | 4.053       | XR_035350              |
| <i>Ccl12</i>         | 4.045       | NM_011331              |
| <i>Fcgr3</i>         | 4.038       | NM_010188              |
| <i>Clec7a</i>        | 4.033       | NM_020008              |
| <i>Gdf3</i>          | 4.020       | NM_008108              |
| <i>Rtp4</i>          | 4.010       | NM_023386              |

TABLE S2. Effect of Treg cell transfer on gene transcription during IAV infection of lymphocyte-deficient mice. List of genes with altered expression in the lungs from PR8-infected *Rag1*<sup>-/-</sup> Treg cell recipients, in comparison with those from PR8-infected *Rag1*<sup>-/-</sup> control mice.

| Gene symbol           | Fold change | Sequence reference     |
|-----------------------|-------------|------------------------|
| <b>Down-regulated</b> |             |                        |
| <i>Chi3l4</i>         | 5.092       | NM_145126              |
| <i>Tdo2</i>           | 3.690       | NM_019911              |
| <i>Angptl7</i>        | 3.228       | NM_001039554           |
| <i>Sprr2a</i>         | 2.953       | NM_011468              |
| <i>Gsdmc2</i>         | 2.871       | NM_177912              |
| <i>Ccl8</i>           | 2.856       | NM_021443              |
| <i>EG449630</i>       | 2.762       | NR_002172              |
| <i>Krt5</i>           | 2.705       | NM_027011              |
| <i>Mmp13</i>          | 2.700       | NM_008607              |
| <i>Gpnmb</i>          | 2.685       | NM_053110              |
| <i>Rnu3a</i>          | 2.645       | NR_002842              |
| <i>Ctca2</i>          | 2.564       | NM_030601              |
| <i>Alox15</i>         | 2.544       | NM_009660              |
| <i>Cxcl13</i>         | 2.473       | NM_018866              |
| <i>Chd7</i>           | 2.473       | NM_001081417           |
| <i>Alox12e</i>        | 2.396       | NM_145684              |
| <i>Abca1</i>          | 2.335       | NM_013454              |
| <i>Rnu15-b</i>        | 2.299       | NR_002173              |
| <i>Chd7</i>           | 2.279       | NM_001081417           |
| <i>Fkbp5</i>          | 2.267       | NM_010220              |
| <i>Pla2g7</i>         | 2.251       | NM_013737              |
| <i>Chd7</i>           | 2.246       | NM_001081417           |
| <i>Gpr65</i>          | 2.187       | NM_008152              |
| <i>Chd7</i>           | 2.156       | NM_001081417           |
| <i>ND6</i>            | 2.153       | NC_005089              |
| <i>Sfn3</i>           | 2.136       | NR_004414              |
| <i>Spp1</i>           | 2.130       | NM_009263              |
| <i>Npl</i>            | 2.087       | NM_028749              |
| <i>Serpina3m</i>      | 2.054       | NM_009253              |
| <i>Pglyrp1</i>        | 2.050       | NM_009402              |
| <i>Itgb8</i>          | 2.041       | NM_177290              |
| <i>Chd7</i>           | 2.028       | NM_001081417           |
| <i>Prg4</i>           | 2.026       | NM_021400 NM_001110146 |
| <i>Ptgds2</i>         | 2.024       | NM_019455              |
| <i>Chd7</i>           | 2.020       | NM_001081417           |
| <i>Slc7a11</i>        | 2.019       | NM_011990              |
| <b>Up-regulated</b>   |             |                        |
| <i>Cyp1a1</i>         | 4.241       | NM_009992              |
| <i>Myl7</i>           | 3.849       | NM_022879              |
| <i>Tppp3</i>          | 3.557       | NM_026481              |
| <i>Acox1</i>          | 3.153       | NM_028765              |
| <i>Lyz1</i>           | 2.966       | NM_013590              |
| <i>Myl4</i>           | 2.638       | NM_010858              |
| <i>Tmem100</i>        | 2.520       | NM_026433              |
| <i>Hc</i>             | 2.513       | NM_010406              |
| <i>Rtkn2</i>          | 2.487       | NM_001081346           |
| <i>Hspa1b Hspa1a</i>  | 2.451       | NM_010478              |
| <i>Adh1</i>           | 2.429       | NM_007409              |
| <i>Actc1</i>          | 2.425       | NM_009608              |
| <i>Fbp1</i>           | 2.383       | NM_019395              |
| <i>Stmn2</i>          | 2.357       | NM_025285              |
| <i>Scgb3a2</i>        | 2.354       | NM_054038              |
| <i>Spon2</i>          | 2.338       | NM_133903              |
| <i>Cldn5</i>          | 2.246       | NM_013805              |
| <i>Tinag</i>          | 2.217       | NM_012033              |
| <i>Pcp4l1</i>         | 2.180       | NM_025557              |

| Gene symbol          | Fold change | Sequence reference  |
|----------------------|-------------|---------------------|
| <i>Tcf21</i>         | 2.178       | NM_011545           |
| <i>Nppa</i>          | 2.177       | NM_008725           |
| <i>Cyp2f2</i>        | 2.164       | NM_007817           |
| <i>Cd209a</i>        | 2.148       | NM_133238           |
| <i>Tspan12</i>       | 2.142       | NM_173007           |
| <i>Maob</i>          | 2.116       | NM_172778           |
| <i>Thbs3</i>         | 2.078       | NM_013691           |
| <i>Lgi3</i>          | 2.077       | NM_145219           |
| <i>Itih4</i>         | 2.074       | NM_018746           |
| <i>Pcolce2</i>       | 2.064       | NM_029620           |
| <i>Akap5</i>         | 2.054       | NM_001101471        |
| <i>Gimap4</i>        | 2.051       | NM_174990 NM_175048 |
| <i>Hsph1</i>         | 2.046       | NM_013559           |
| <i>Car8</i>          | 2.044       | NM_007592           |
| <i>Hspa1a</i>        | 2.042       | NM_010479           |
| <i>Ctla2a</i>        | 2.033       | NM_007796           |
| <i>Scgb1c1</i>       | 2.029       | NM_001099742        |
| <i>Pon1</i>          | 2.020       | NM_011134           |
| <i>Tmem204</i>       | 2.012       | NM_001001183        |
| <i>Ptprm</i>         | 2.004       | NM_008984           |
| <i>Cyp1a1</i>        | 4.241       | NM_009992           |
| <i>Myl7</i>          | 3.849       | NM_022879           |
| <i>Tppp3</i>         | 3.557       | NM_026481           |
| <i>Acox1</i>         | 3.153       | NM_028765           |
| <i>Lyz1</i>          | 2.966       | NM_013590           |
| <i>Myl4</i>          | 2.638       | NM_010858           |
| <i>Tmem100</i>       | 2.520       | NM_026433           |
| <i>Hc</i>            | 2.513       | NM_010406           |
| <i>Rtkn2</i>         | 2.487       | NM_001081346        |
| <i>Hspa1b Hspa1a</i> | 2.451       | NM_010478           |
| <i>Adh1</i>          | 2.429       | NM_007409           |
